# Supplementary material for: Comparisons of Nutrient Intakes and Diet Quality among Water-Based Beverage Consumers
Source: MDPI journal article supplement (doi:10.3390/nu11020314), 2019-02-01
Supplement: s1 [file s1]

## Supplemental Material

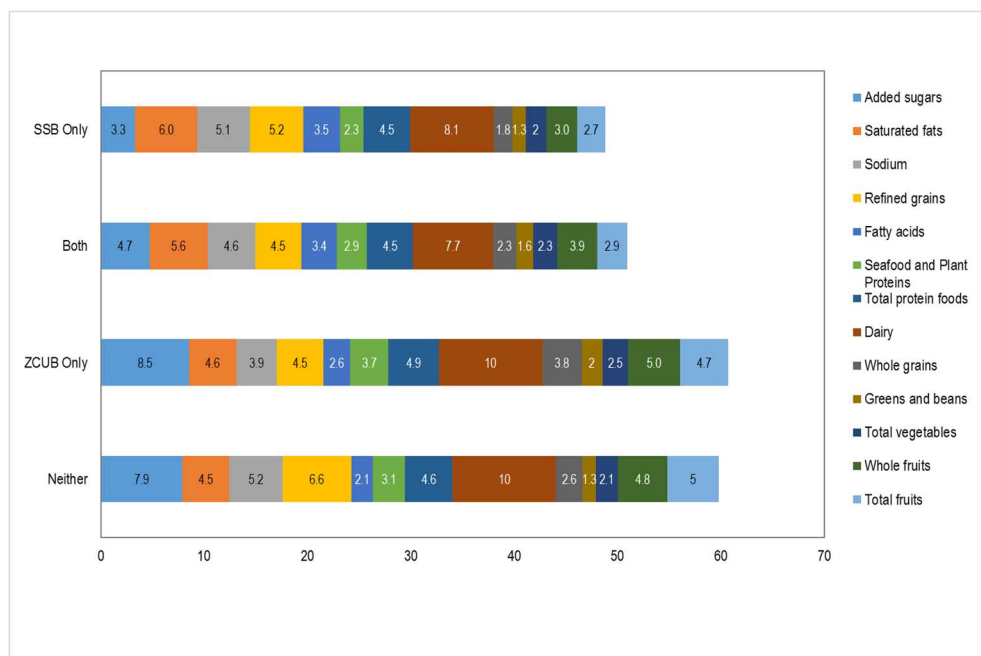

**Figure S1.** Mean scores for sub-components of the HEI-2015 among children 2-18 y by ZCUB consumer group, NHANES 2009-2016; HEI-2015 scores calculated using the population ratio method with Day 1 dietary intake.

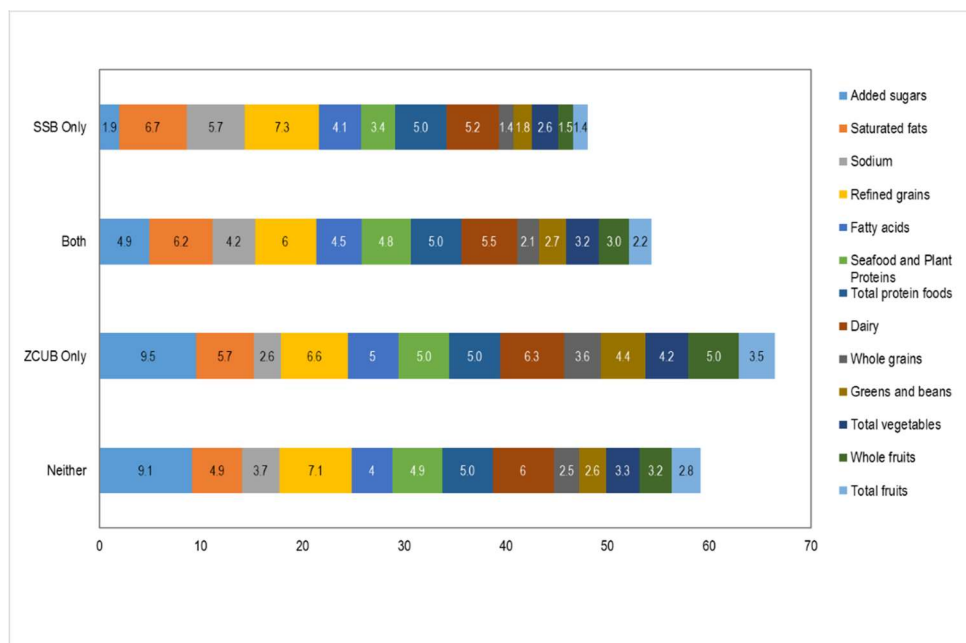

**Figure S2.** Mean scores for sub-components of the HEI-2015 among adults 19-64 y by ZCUB consumer group, NHANES 2009-2016; HEI-2015 scores calculated using the population ratio method with Day 1 dietary intake.

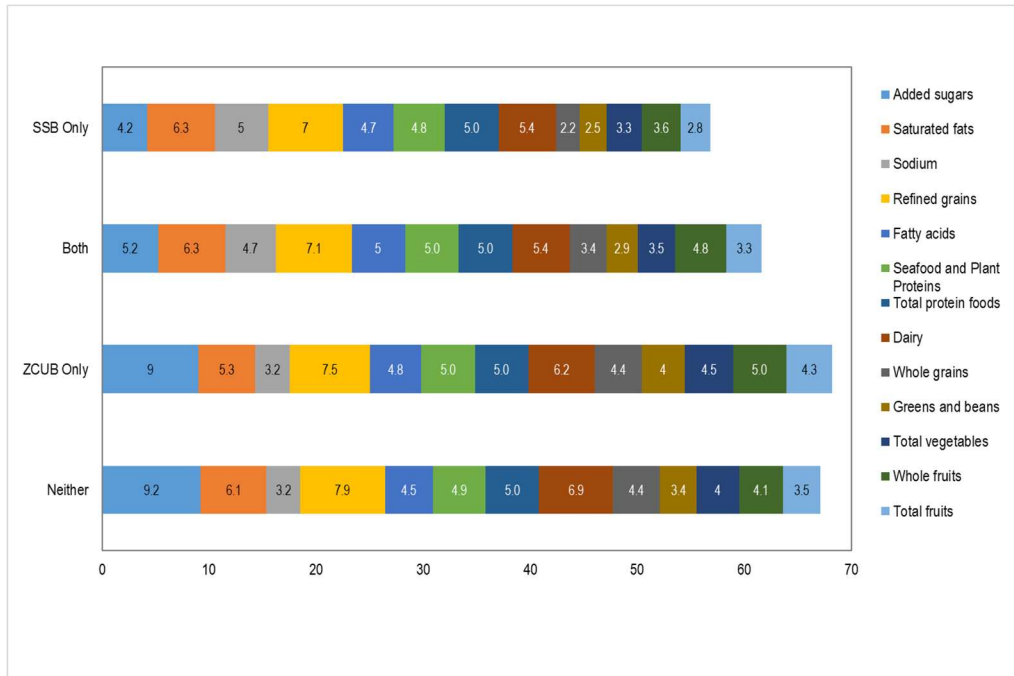

**Figure S3.** Mean scores for sub-components of the HEI-2015 among older adults 65+ y by ZCUB consumer group, NHANES 2009-2016; HEI-2015 scores calculated using the population ratio method with Day 1 dietary intake.

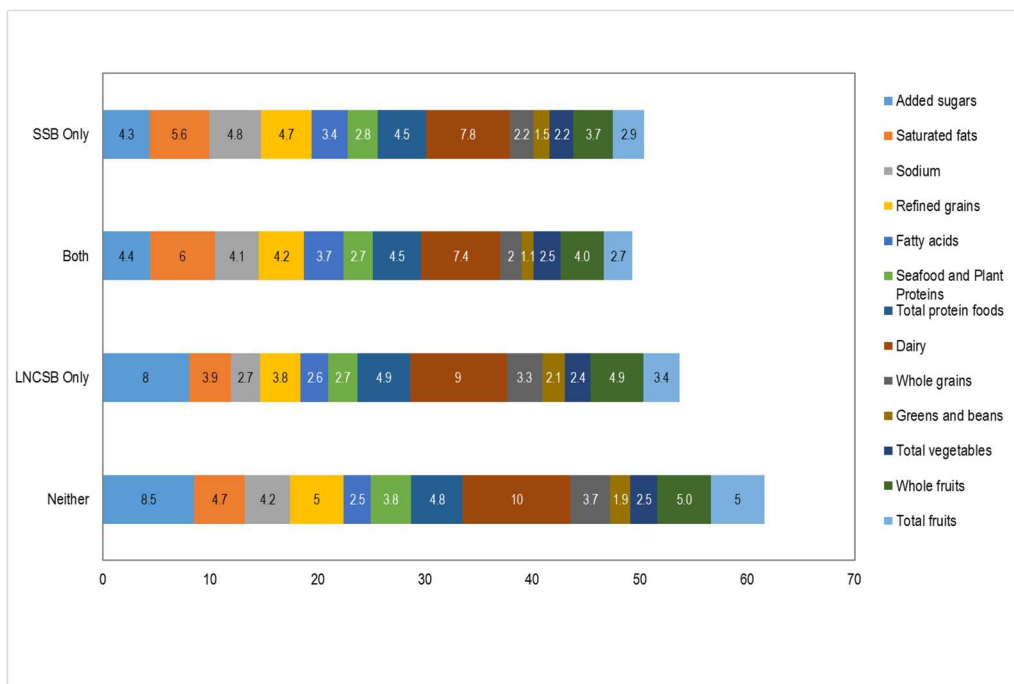

**Figure S4.** Mean scores for sub-components of the HEI-2015 among children 2-18 y by LNCSB consumer group, NHANES 2009-2016; HEI-2015 scores calculated using the population ratio method with Day 1 dietary intake.

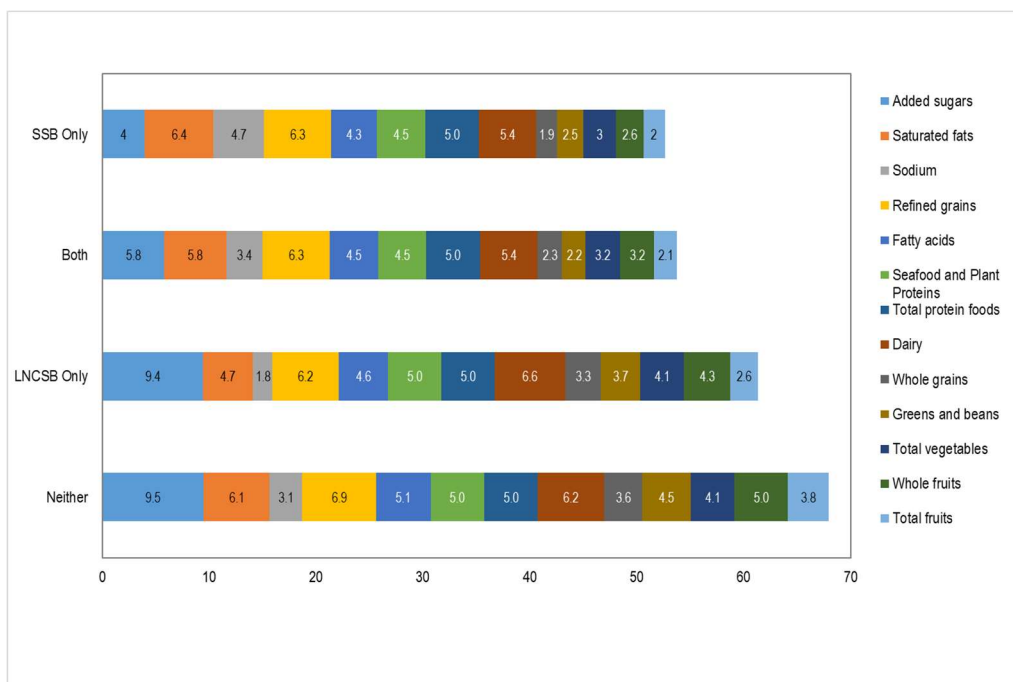

**Figure S5.** Mean scores for sub-components of the HEI-2015 among adults 19-64 y by LNCSB consumer group, NHANES 2009-2016; HEI-2015 scores calculated using the population ratio method with Day 1 dietary intake.

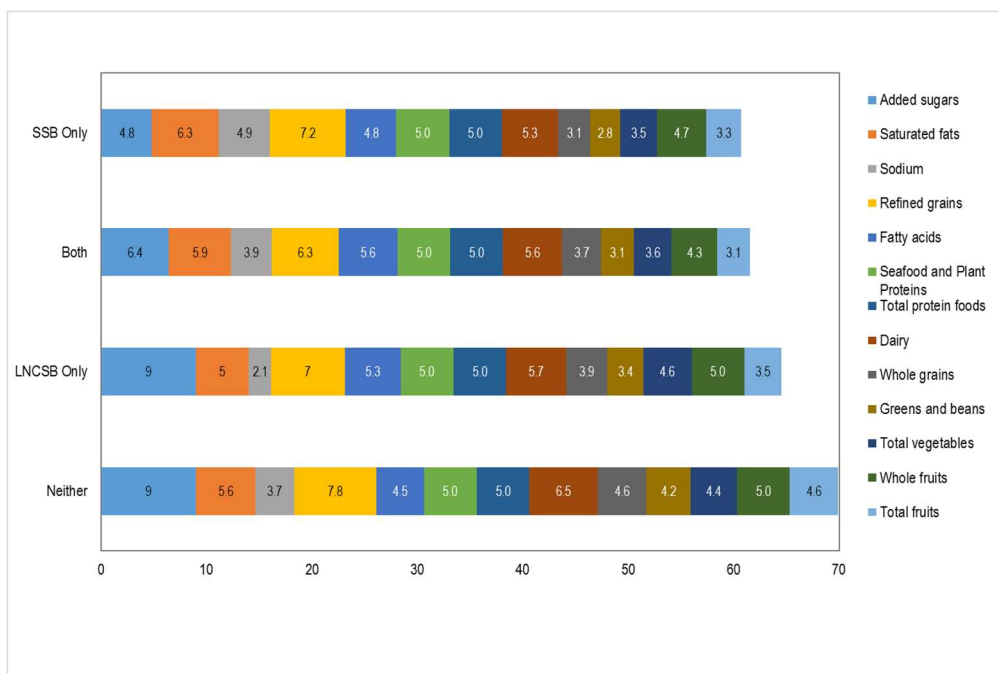

**Figure S6.** Mean scores for sub-components of the HEI-2015 among older adults 65+ y by LNCSB consumer group, NHANES 2009-2016; HEI-2015 scores calculated using the population ratio method with Day 1 dietary intake.

**Table S1.** Adjusted HEI-2015 Component scores across Zero-Calorie Unsweetened Beverage (ZCUB) and Sugar-Sweetened Beverage (SSB) consumer groups and lifestages, NHANES 2009-2016

|                            |     | SSB Only                                                                   | Both        | ZCUB Only   | Neither |
|----------------------------|-----|----------------------------------------------------------------------------|-------------|-------------|---------|
|                            |     | Adjusted relative difference $\pm$ standard error ( $\pm$ SE) <sup>†</sup> |             |             |         |
| 2-18 years                 |     |                                                                            |             |             |         |
| Total fruits               | Ref | 1.1 (0.05)*                                                                | 1.5 (0.07)* | 1.6 (0.07)* |         |
| Whole fruits               | Ref | 1.3 (0.06)*                                                                | 1.6 (0.09)* | 1.4 (0.09)* |         |
| Total vegetables           | Ref | 1.1 (0.03)*                                                                | 1.2 (0.04)* | 1.1 (0.06)  |         |
| Greens and beans           | Ref | 1.5 (0.16)*                                                                | 1.8 (0.21)* | 1.2 (0.24)  |         |
| Whole grains               | Ref | 1.2 (0.08)*                                                                | 1.7 (0.12)* | 1.3 (0.11)* |         |
| Dairy                      | Ref | 1.0 (0.02)                                                                 | 1.1 (0.02)* | 1.1 (0.04)* |         |
| Total protein foods        | Ref | 1.0 (0.02)                                                                 | 1.1 (0.02)* | 1.0 (0.03)  |         |
| Seafood and Plant Proteins | Ref | 1.2 (0.07)*                                                                | 1.4 (0.09)* | 1.3 (0.15)* |         |
| Fatty acids                | Ref | 1.0 (0.03)                                                                 | 0.9 (0.04)* | 0.9 (0.07)  |         |
| Refined grains             | Ref | 0.9 (0.02)*                                                                | 0.9 (0.03)* | 1.1 (0.05)* |         |
| Sodium                     | Ref | 0.9 (0.03)*                                                                | 0.8 (0.03)* | 1.0 (0.04)  |         |
| Added sugars               | Ref | 1.3 (0.04)*                                                                | 2.1 (0.05)* | 1.9 (0.07)* |         |
| Saturated fats             | Ref | 0.9 (0.02)*                                                                | 0.8 (0.02)* | 0.8 (0.05)* |         |
| 19-64 years                |     |                                                                            |             |             |         |
| Total fruits               | Ref | 1.4 (0.07)*                                                                | 1.8 (0.10)* | 1.5 (0.15)* |         |
| Whole fruits               | Ref | 1.7 (0.12)*                                                                | 2.2 (0.16)* | 1.6 (0.21)* |         |
| Total vegetables           | Ref | 1.1 (0.03)*                                                                | 1.2 (0.03)* | 1.1 (0.05)  |         |
| Greens and beans           | Ref | 1.3 (0.08)*                                                                | 1.7 (0.10)* | 1.1 (0.13)  |         |
| Whole grains               | Ref | 1.4 (0.08)*                                                                | 2.0 (0.11)* | 1.4 (0.14)* |         |
| Dairy                      | Ref | 1.1 (0.03)*                                                                | 1.2 (0.03)* | 1.1 (0.05)* |         |
| Total protein foods        | Ref | 1.0 (0.02)*                                                                | 1.1 (0.02)* | 1.0 (0.02)  |         |
| Seafood and Plant Proteins | Ref | 1.3 (0.05)*                                                                | 1.6 (0.06)* | 1.2 (0.11)* |         |
| Fatty acids                | Ref | 1.0 (0.03)                                                                 | 1.1 (0.04)* | 1.0 (0.06)  |         |
| Refined grains             | Ref | 0.9 (0.02)*                                                                | 0.9 (0.02)* | 0.9 (0.04)* |         |
| Sodium                     | Ref | 0.8 (0.02)*                                                                | 0.7 (0.02)* | 0.8 (0.05)* |         |
| Added sugars               | Ref | 1.5 (0.05)*                                                                | 2.6 (0.09)* | 2.6 (0.10)* |         |
| Saturated fats             | Ref | 0.9 (0.02)*                                                                | 0.9 (0.02)* | 0.8 (0.05)* |         |
| 65+ years                  |     |                                                                            |             |             |         |
| Total fruits               | Ref | 1.1 (0.11)                                                                 | 1.3 (0.13)* | 1.0 (0.12)  |         |
| Whole fruits               | Ref | 1.2 (0.14)                                                                 | 1.5 (0.17)* | 1.1 (0.13)  |         |
| Total vegetables           | Ref | 1.1 (0.06)                                                                 | 1.2 (0.07)* | 1.1 (0.07)* |         |
| Greens and beans           | Ref | 1.2 (0.18)                                                                 | 1.3 (0.20)  | 1.3 (0.27)  |         |
| Whole grains               | Ref | 1.4 (0.16)*                                                                | 1.8 (0.18)* | 1.7 (0.23)* |         |
| Dairy                      | Ref | 1.0 (0.07)                                                                 | 1.1 (0.07)  | 1.1 (0.10)  |         |
| Total protein foods        | Ref | 1.0 (0.03)                                                                 | 1.1 (0.03)  | 1.0 (0.04)  |         |
| Seafood and Plant Proteins | Ref | 1.1 (0.12)                                                                 | 1.2 (0.13)* | 1.0 (0.14)  |         |
| Fatty acids                | Ref | 1.0 (0.08)                                                                 | 1.0 (0.07)  | 1.0 (0.08)  |         |
| Refined grains             | Ref | 1.1 (0.05)                                                                 | 1.0 (0.05)  | 1.1 (0.08)  |         |
| Sodium                     | Ref | 0.9 (0.05)                                                                 | 0.8 (0.04)* | 0.8 (0.07)* |         |
| Added sugars               | Ref | 1.1 (0.07)                                                                 | 1.8 (0.11)* | 1.8 (0.12)* |         |
| Saturated fats             | Ref | 1.0 (0.05)                                                                 | 0.9 (0.05)* | 0.9 (0.07)  |         |

<sup>†</sup>Linear regression models adjusted for survey cycle, age, sex, race/ethnicity, BMI, household reference education, household poverty income ratio, and dieting status; \*Significant at the  $p=0.05$  level.

**Table S2.** Adjusted HEI-2015 Component scores across Low/No-Calorie Sweetened Beverage (LNCSB) and Sugar-Sweetened Beverage (SSB) consumer groups and lifestages, NHANES 2009-2016

|                            |                                                                           | LNCSB       |             |             |
|----------------------------|---------------------------------------------------------------------------|-------------|-------------|-------------|
|                            | SSB Only                                                                  | Both        | Only        | Neither     |
|                            | Adjusted relative difference $\pm$ standard error( $\pm$ SE) <sup>†</sup> |             |             |             |
| 2-18 years                 |                                                                           |             |             |             |
| Total fruits               | Ref                                                                       | 1.0 (0.10)  | 1.1 (0.08)  | 1.4 (0.05)* |
| Whole fruits               | Ref                                                                       | 1.0 (0.11)  | 1.3 (0.09)* | 1.3 (0.05)* |
| Total vegetables           | Ref                                                                       | 1.1 (0.05)* | 1.1 (0.06)  | 1.1 (0.03)* |
| Greens and beans           | Ref                                                                       | 0.7 (0.16)  | 1.0 (0.16)  | 1.3 (0.09)* |
| Whole grains               | Ref                                                                       | 0.8 (0.10)  | 1.3 (0.12)* | 1.5 (0.06)* |
| Dairy                      | Ref                                                                       | 0.9 (0.04)  | 1.1 (0.03)  | 1.1 (0.02)* |
| Total protein foods        | Ref                                                                       | 1.0 (0.06)  | 1.1 (0.03)* | 1.0 (0.01)  |
| Seafood and Plant Proteins | Ref                                                                       | 1.0 (0.12)  | 1.1 (0.11)  | 1.2 (0.05)* |
| Fatty acids                | Ref                                                                       | 1.1 (0.08)  | 1.0 (0.07)  | 0.9 (0.03)* |
| Refined grains             | Ref                                                                       | 0.9 (0.06)  | 0.9 (0.05)* | 1.0 (0.02)  |
| Sodium                     | Ref                                                                       | 0.9 (0.05)  | 0.7 (0.05)* | 0.9 (0.02)* |
| Added sugars               | Ref                                                                       | 1.0 (0.06)  | 1.7 (0.05)* | 1.7 (0.03)* |
| Saturated fats             | Ref                                                                       | 1.0 (0.04)  | 0.8 (0.04)* | 0.9 (0.02)* |
| 19-64 years                |                                                                           |             |             |             |
| Total fruits               | Ref                                                                       | 1.1 (0.08)  | 1.1 (0.06)  | 1.4 (0.05)* |
| Whole fruits               | Ref                                                                       | 1.1 (0.09)  | 1.2 (0.06)* | 1.5 (0.05)* |
| Total vegetables           | Ref                                                                       | 1.0 (0.03)  | 1.1 (0.02)* | 1.1 (0.02)* |
| Greens and beans           | Ref                                                                       | 0.9 (0.09)  | 1.2 (0.06)* | 1.3 (0.05)* |
| Whole grains               | Ref                                                                       | 1.1 (0.09)  | 1.4 (0.07)* | 1.6 (0.06)* |
| Dairy                      | Ref                                                                       | 1.0 (0.04)  | 1.1 (0.03)* | 1.1 (0.02)* |
| Total protein foods        | Ref                                                                       | 1.0 (0.02)* | 1.1 (0.01)* | 1.0 (0.01)* |
| Seafood and Plant Proteins | Ref                                                                       | 1.0 (0.06)  | 1.1 (0.04)* | 1.3 (0.04)* |
| Fatty acids                | Ref                                                                       | 1.0 (0.05)  | 1.0 (0.03)  | 1.1 (0.02)* |
| Refined grains             | Ref                                                                       | 0.9 (0.03)  | 0.9 (0.02)* | 1.0 (0.02)  |
| Sodium                     | Ref                                                                       | 0.8 (0.05)* | 0.6 (0.03)* | 0.8 (0.02)* |
| Added sugars               | Ref                                                                       | 1.2 (0.04)* | 1.9 (0.04)* | 1.9 (0.03)* |
| Saturated fats             | Ref                                                                       | 0.9 (0.03)* | 0.8 (0.02)* | 1.0 (0.02)* |
| 65+ years                  |                                                                           |             |             |             |
| Total fruits               | Ref                                                                       | 1.1 (0.10)  | 1.0 (0.05)  | 1.2 (0.05)* |
| Whole fruits               | Ref                                                                       | 1.0 (0.11)  | 1.1 (0.06)* | 1.3 (0.06)* |
| Total vegetables           | Ref                                                                       | 1.0 (0.05)  | 1.1 (0.03)* | 1.1 (0.03)* |
| Greens and beans           | Ref                                                                       | 1.2 (0.17)  | 1.1 (0.11)  | 1.2 (0.10)* |
| Whole grains               | Ref                                                                       | 1.2 (0.11)  | 1.2 (0.11)* | 1.3 (0.07)* |
| Dairy                      | Ref                                                                       | 1.1 (0.09)  | 1.0 (0.05)  | 1.2 (0.04)* |
| Total protein foods        | Ref                                                                       | 1.1 (0.03)* | 1.1 (0.02)* | 1.0 (0.02)* |
| Seafood and Plant Proteins | Ref                                                                       | 1.3 (0.12)* | 1.1 (0.07)  | 1.2 (0.05)* |
| Fatty acids                | Ref                                                                       | 1.1 (0.08)  | 1.1 (0.04)  | 1.0 (0.03)  |
| Refined grains             | Ref                                                                       | 0.9 (0.05)  | 0.9 (0.03)  | 1.0 (0.03)  |
| Sodium                     | Ref                                                                       | 0.9 (0.06)  | 0.6 (0.04)* | 0.9 (0.03)* |
| Added sugars               | Ref                                                                       | 1.2 (0.05)* | 1.7 (0.05)* | 1.7 (0.04)* |
| Saturated fats             | Ref                                                                       | 1.0 (0.05)  | 0.9 (0.03)* | 0.9 (0.03)* |

<sup>†</sup>Linear regression models adjusted for survey cycle, age, sex, race/ethnicity, BMI, household reference education, household poverty income ratio, and dieting status; \*Significant at the  $p=0.05$  level.
